# Supplementary material for: VIPER: Visualization Pipeline for RNA-seq, a Snakemake workflow for efficient and complete RNA-seq analysis
Source: Springer Nature journal article supplement (doi:10.1186/s12859-018-2139-9), 2018-04-12
Supplement: 12859_2018_2139_MOESM3_ESM.pdf [file 12859_2018_2139_MOESM3_ESM.pdf]

# Overview of VIPER Layout

- 160211\_Weinstock\_ExampleData\_VIPER (a)
  - analysis
  - data
  - viper
  - 160211\_Weinstock\_ExampleData\_VIPER\_report.html
  - config.yaml
  - metasheet.csv
  - ref.yaml

- subanalysis3\_TCells
- subanalysis2\_BCells
- subanalysis1\_all (b)
  - plots
    - heatmapSF.txt
    - heatmapSF\_plot.pdf
  - images
    - pca\_plot.pdf
    - heatmapSS.txt
    - heatmapSS\_plot.pdf
    - gene\_counts.fpkm.png
    - sampleSNPcorr\_plot.hla.png
    - sampleSNPcorr\_plot.hla.pdf
  - cufflinks
    - test2\_all\_nobatch.html
  - immunology
  - diffexp
  - virusseq
    - test2\_all\_nobatch.metasheet.csv
    - test2\_all\_nobatch.config.yaml
  - RSeQC
  - STAR\_rRNA
  - STAR\_Fusion
  - STAR
  - snp
  - test\_all\_batch
  - STAR\_rRNA
  - virusseq
  - cdr3
  - bam2bw
  - RSeQC
  - STAR\_Fusion
  - snp
  - cufflinks
  - STAR

Supplementary Figure 2
