# Supplementary material for: VIPER: Visualization Pipeline for RNA-seq, a Snakemake workflow for efficient and complete RNA-seq analysis
Source: Springer Nature journal article supplement (doi:10.1186/s12859-018-2139-9), 2018-04-12
Supplement: 12859_2018_2139_MOESM6_ESM.pdf [file 12859_2018_2139_MOESM6_ESM.pdf]

**(a)** From config.yaml input file into VIPER

```
#Turn on the following if you want a genome wide snp scan in addition to chr6 scan
# possible value are [true,false]
snp_scan_genome: false
```

**(b)** From SNP Module of VIPER

```
-----
# snp calling GENOME wide (hidden config.yaml flag- 'snp_scan_genome:True'
#-----

rule call_snps_genome:
  input:
    bam="analysis/STAR/{sample}/{sample}.sorted.bam",
    ref_fa=config["ref_fasta"],
  output:
    protected("analysis/snp/{sample}/{sample}.snp.genome.vcf")
  params:
    varscan_path=config["varscan_path"]
  message: "Running varscan for snp analysis genome wide"
  shell:
    "samtools mpileup -f {input.ref_fa} {input.bam} | awk '\$4 != 0\` | "
    "{params.varscan_path} mpileup2snp - --min-coverage 20 --min-reads2 4 --output-vcf > {output}"

rule snpEff_annot:
  input:
    vcf="analysis/snp/{sample}/{sample}.snp.genome.vcf"
  output:
    vcf_annot = protected("analysis/snp/{sample}/{sample}.snpEff.annot.vcf"),
    vcf_stats = protected("analysis/snp/{sample}/{sample}.snpEff_summary.html")
  params:
    snpEff_conf=config["snpEff_conf"],
    snpEff_db=config['snpEff_db']
  message: "Running varscan for snpEff annotation analysis"
  shell:
    "snpEff -Xmx2G -stats {output.vcf_stats} -c {params.snpEff_conf} {params.snpEff_db} {input.vcf} > {output.vcf_annot}"
```

## Supplementary Figure 4
