# Supplementary material for: VIPER: Visualization Pipeline for RNA-seq, a Snakemake workflow for efficient and complete RNA-seq analysis
Source: Springer Nature journal article supplement (doi:10.1186/s12859-018-2139-9), 2018-04-12
Supplement: 12859_2018_2139_MOESM8_ESM.pdf [file 12859_2018_2139_MOESM8_ESM.pdf]

(a)

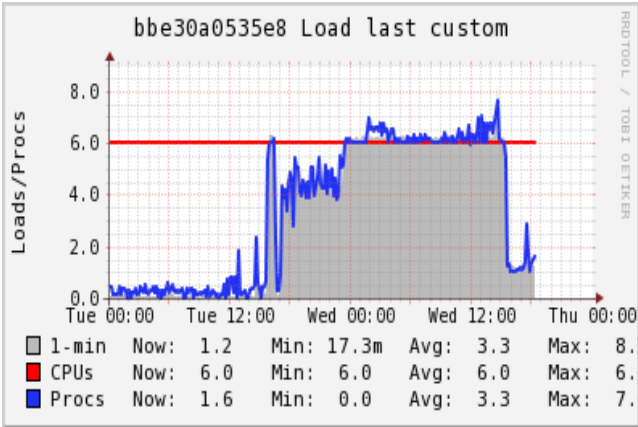

(b)

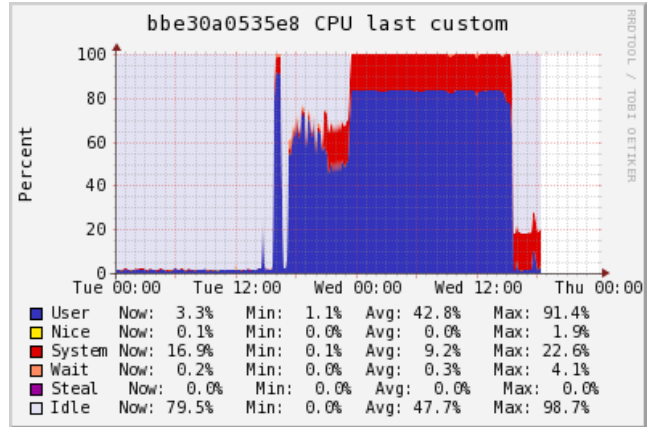

(c)

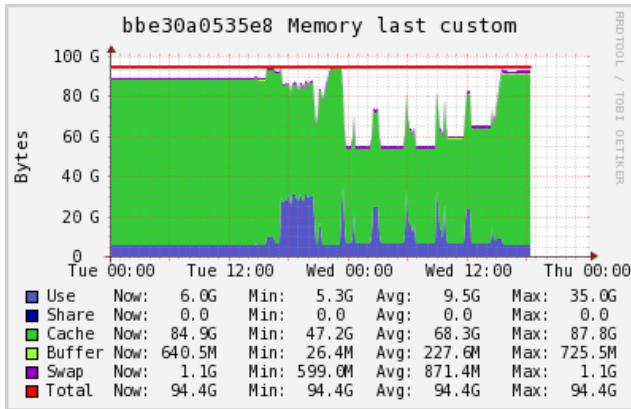

Supplementary Figure 3
